# Supplementary material for: Translation, Cross-Cultural Adaptation, And Validation of The Japanese Version of The Patient Education Materials Assessment Tool (PEMAT)
Source: Research Square preprint supplement (doi:10.21203/rs.3.rs-909531/v1), 2021-09-27
Supplement: Supplementary file 1 [file b1761eaebc84002cef95b682.xlsx]

## Sheet: Sheet1
Table 6 Perceived self-efficacy of the participants.
PEMAT-P	High-scoring material			Low-scoring material
	Mean	SD		Mean	SD	P-value
Baseline	1.71	10.16		2.22	10.55	0.4862
Post-intervention	3.94	11.07		3.75	10.84	0.8107
Difference	2.22	7.09		1.53	6.28	0.1421
PEMAT-A/V	High-scoring material			Low-scoring material
	Mean	SD		Mean	SD	P-value
Pre-intervention	11.74	4.34		12.04	4.49	0.345
Post-intervention	13.92	4.81		13.5	4.86	0.2167
Δscore	2.18	3.76		1.46	3.2	0.00373	**
P-values were generated from t-test
SD = standard deviation.
+p < .10, *p < .05, **p < .01, ***p < .001
