# Supplementary material for: Translation, Cross-Cultural Adaptation, And Validation of The Japanese Version of The Patient Education Materials Assessment Tool (PEMAT)
Source: Research Square preprint supplement (doi:10.21203/rs.3.rs-909531/v1), 2021-09-27
Supplement: Supplementary file 2 [file cf115f62fdf587ed282eb23f.xlsx]

## Sheet: Sheet1
Table 5 Assessment of the material by non-experts
PEMAT-P	High-scoring material			Low-scoring material
	Score	SD		Score	SD	P-value
Overall understandability	6.53	2.32		5.96	2.08	0.0002862	***
The material makes its purpose completely evident. (Item 1)	6.24	2.23		5.89	2.11	0.02382	*
The material uses common, everyday language. (Item 3)	6.65	2.19		6.2	2.07	0.003337	**
The material’s sections have informative headers. (Item 8)	6.48	2.2		6.09	2.14	0.0115	*
The material presents information in a logical sequence. (Item 9)	6.28	2.15		5.92	1.98	0.01464	*
The material uses visual cues to draw attention to key points. (Item 11)	6.3	2.15		5.87	2.1	0.003653	**
The material uses clear illustrations and photographs. (Item 17)	6.5	2.24		5.89	2.07	8.627e-05	***
Overall actionability	6.04	2.17		5.49	1.93	0.0001977	***
The material clearly identifies at least one action the user can take. (Item 19)	6.24	2.16		5.74	1.95	0.0005681	***
The material breaks down any action into manageable, explicit steps. (Item 21)	6.08	2.13		5.57	1.86	0.0003647	***
PEMAT-A/V	High-scoring material			Low-scoring material
	Score	SD		Score	SD	P-value
Overall understandability	7.65	2.17		6.76	2.12	6.479e-09	***
The material makes its purpose completely evident.	7.54	2.21		7.08	2.23	0.003459	**
The material uses common, everyday language.	7.64	2.18		6.7	2.16	1.468e-09	***
The material’s sections have informative headers.	7.44	2.13		6.56	2.17	1.06e-08	***
The material presents information in a logical sequence.	7.53	2.19		6.9	2.1	4.114e-05	***
The material uses visual cues to draw attention to key points.	7.23	2.15		6.64	2.11	8.51e-05	***
The material uses clear illustrations and photographs.	7.2	2.13		6.72	2.07	0.001422	**
Overall actionability	7.48	2.22		6.36	2.11	4.857e-13	***
The material clearly identifies at least one action the user can take.	7.6	2.17		6.58	2.11	2.395e-11	***
The material breaks down any action into manageable, explicit steps.	7.5	2.15		6.3	2.1	4.714e-15	***
t-test, no directional assumption
+p < .10, *p < .05, **p < .01, ***p < .001
SD = standard deviation.
